# Supplementary material
Source: MDPI journal article supplement (https://www.mdpi.com/2227-9040/11/8/441)
Supplement: s1 [file s1]

# Fabrication and Characterization of Hybrid and Tunable ZnO@Ag Flexible Thin Films Used as SERS Substrates

Ioana Andreea Brezeştean <sup>1</sup>, Daniel Marconi <sup>1</sup>, Nicoleta Elena Dina <sup>1</sup>, Maria Suciuc <sup>2,3,\*</sup> and Alia Colniţă <sup>1,\*</sup>

<sup>1</sup> Department of Molecular and Biomolecular Physics, National Institute for Research and Development of Isotopic and Molecular Technologies, 67-103 Donat, 400293 Cluj-Napoca, Romania;

<sup>2</sup> Electron Microscopy Centre “C. Crăciun”, Faculty of Biology and Geology, Babeş -Bolyai University, 5-7 Clinicilor, 400006 Cluj-Napoca, Romania

<sup>3</sup> Electron Microscopy Integrated Laboratory LIME-CETATEA, National Institute for Research and Development of Isotopic and Molecular Technologies, 67-103 Donat, 400293 Cluj-Napoca, Romania

\* Correspondence: maria.suciuc@itim-cj.ro (M.S.); alia.colnita@itim-cj.ro (A.C.); Tel.: +4-0264-584037 (M.S, A.C.)

| Substrate | Deposition time (min) | Final substrate temperature (°C) |
|-----------|-----------------------|----------------------------------|
|           | Abbreviation          |                                  |
| Zeonor    | 15                    | 27                               |
|           | <b>Zeonor@15</b>      |                                  |
|           | 30                    | 27                               |
|           | <b>Zeonor@30</b>      |                                  |
|           | 60                    | 30                               |
|           | <b>Zeonor@60</b>      |                                  |
| Topas     | 15                    | 25                               |
|           | <b>Topas@15</b>       |                                  |
|           | 30                    | 25                               |
|           | <b>Topas@30</b>       |                                  |
|           | 60                    | 28                               |
|           | <b>Topas@60</b>       |                                  |
| Topas@2   | 15                    | 27                               |
|           | <b>Topas2@15</b>      |                                  |
|           | 30                    | 27                               |
|           | <b>Topas2@30</b>      |                                  |
|           | 60                    | 29                               |
|           | <b>Topas2@60</b>      |                                  |

**Table S1** – The detailed parameters of MS deposition at RT for ZnO thin films.

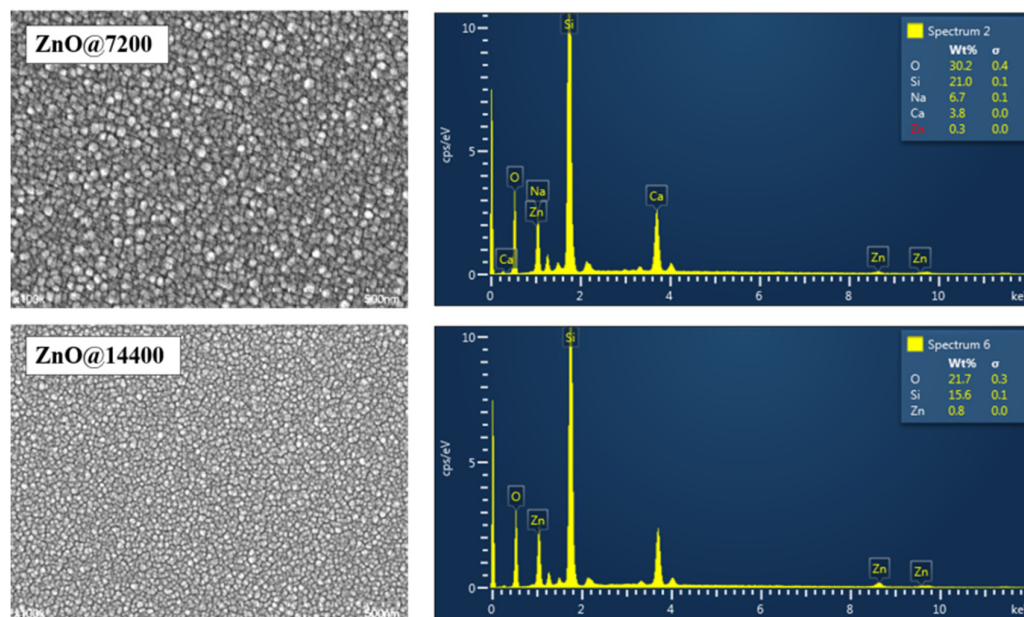

**Figure S1.** Representative SEM images (left) and EDX spectra (right) of ZnO films deposited on glass by PLD at RT in O<sub>2</sub> bleeding gas and a number of laser pulses of 7200 and 14400, respectively. The growth mode of the films is similar to that of the MS deposited films on Zeonor® and Topas® with a granular structure without defects or voids. This may also be due to the fact that both glass and polymer films have an amorphous structure. EDX spectra show the amount of O and Zn present in the deposited films. Along with the increase of the number of laser pulses, there was a slight increase in the Zn content.

**Table S2.** – The detailed parameters of MS deposition at RT for Ag thin films on top of ZnO nanostructures.

| Substrate | Ag film thickness (nm) | Deposition rate (nm/min) | Current (mA) | Rotation (nm/min) | Abbreviation |    |   |            |    |   |          |
|-----------|------------------------|--------------------------|--------------|-------------------|--------------|----|---|------------|----|---|----------|
| Zeonor    | 15                     | 7                        | 35           | 5                 | Zeonor@Ag    |    |   |            |    |   |          |
| Zeonor@15 |                        |                          |              |                   | Zeonor15@Ag  |    |   |            |    |   |          |
| Zeonor@30 |                        |                          |              |                   | Zeonor30@Ag  |    |   |            |    |   |          |
| Zeonor@60 |                        |                          |              |                   | Zeonor60@Ag  |    |   |            |    |   |          |
| Topas     | 30                     |                          |              |                   | 7            | 35 | 5 | Topas@Ag   |    |   |          |
| Topas@15  |                        |                          |              |                   |              |    |   | Topas15@Ag |    |   |          |
| Topas@30  |                        |                          |              |                   |              |    |   | Topas30@Ag |    |   |          |
| Topas@60  |                        |                          |              |                   |              |    |   | Topas60@Ag |    |   |          |
| Topas2    | 7                      |                          |              |                   |              |    |   | 7          | 35 | 5 | Top@Ag   |
| Topas2@15 |                        |                          |              |                   |              |    |   |            |    |   | Top15@Ag |
| Topas2@30 |                        |                          |              |                   |              |    |   |            |    |   | Top30@Ag |
| Topas2@60 |                        |                          |              |                   |              |    |   |            |    |   | Top60@Ag |

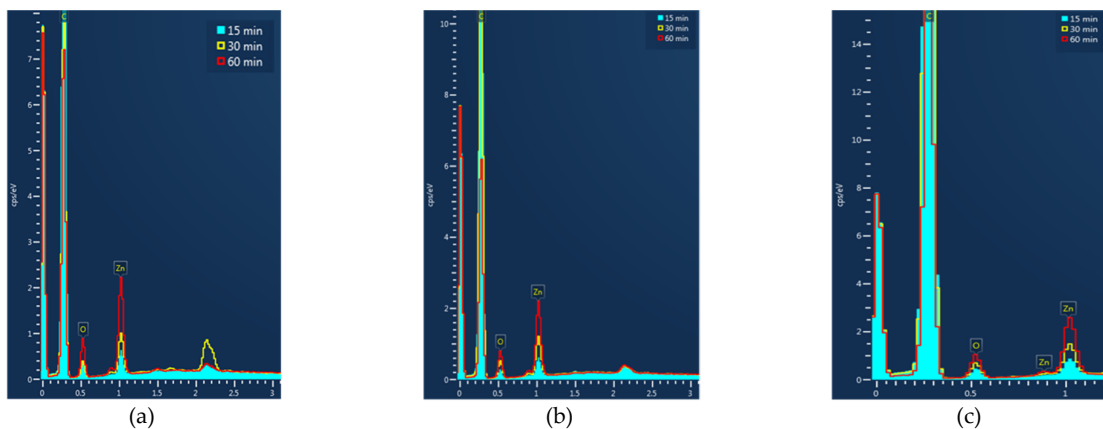

**Figure S2.** Comparative EDX spectra confirming the film growth and proportional increasing of Zn and O elements in concordance with the increasing deposition time in the ZnO films deposited on (a) Zeonor, (b) Topas® and (c) Topas@2.

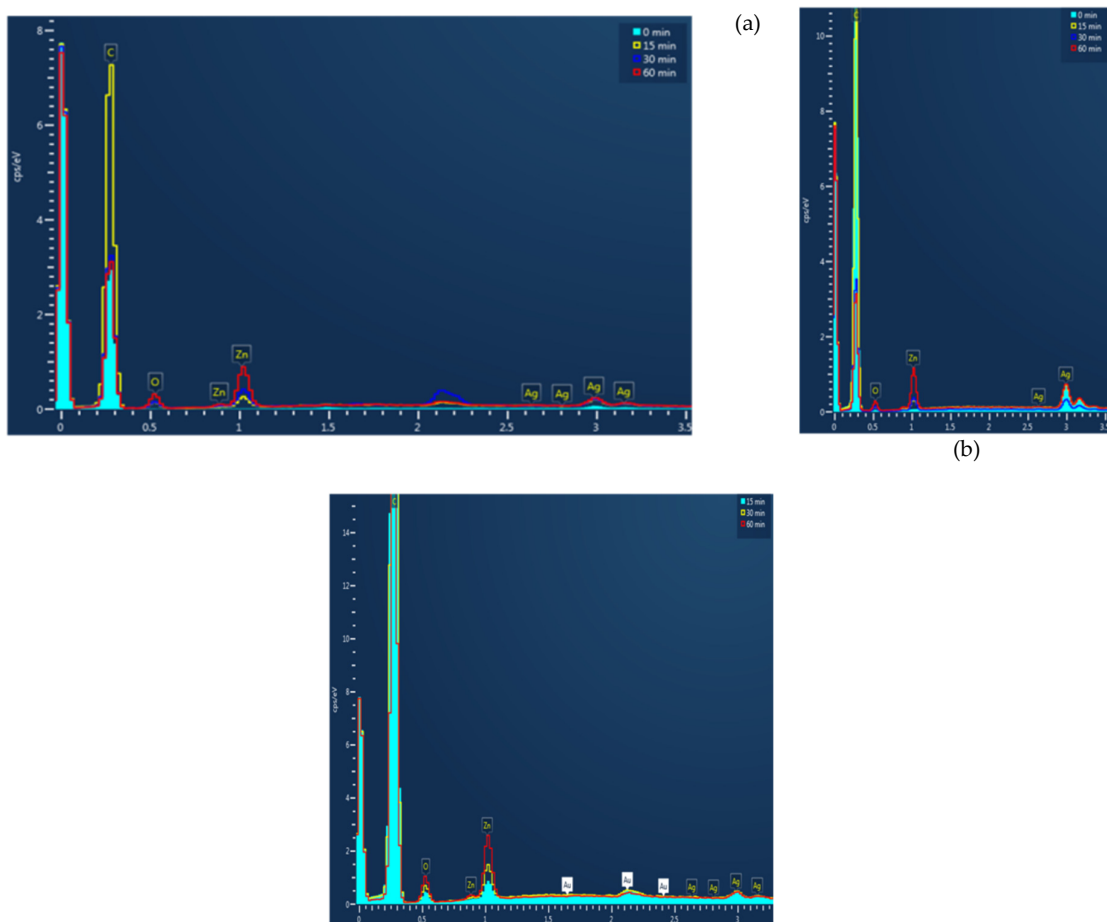

**Figure S3.** Comparative EDX spectra confirming the Ag film growth and proportional increasing of Ag element in the hybrid samples on (a) Zeonor, (b) Topas® and (c) Topas@2.

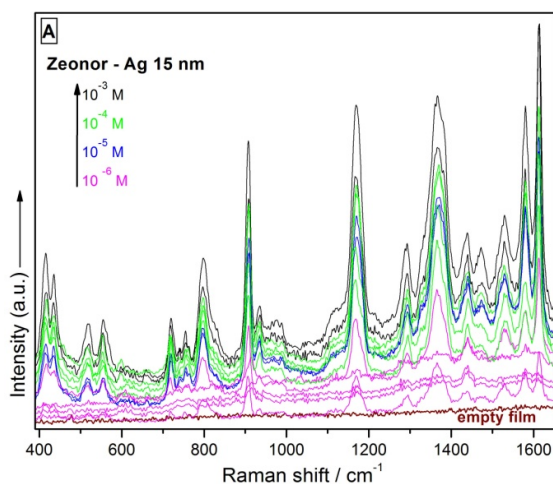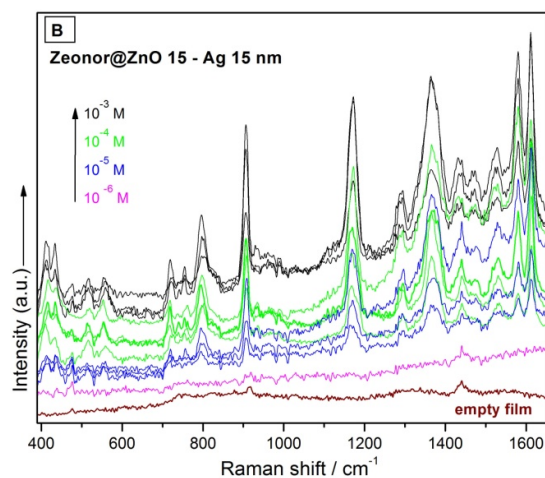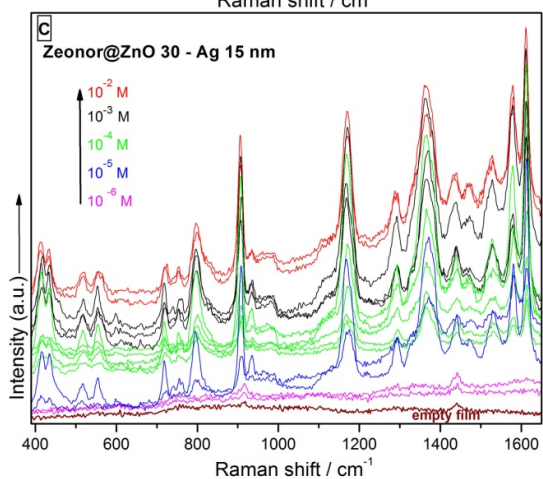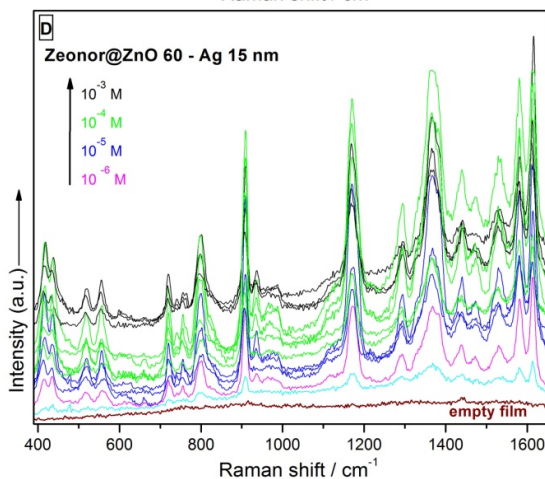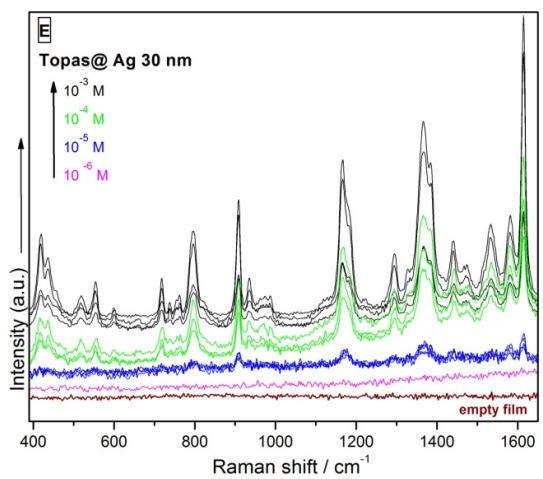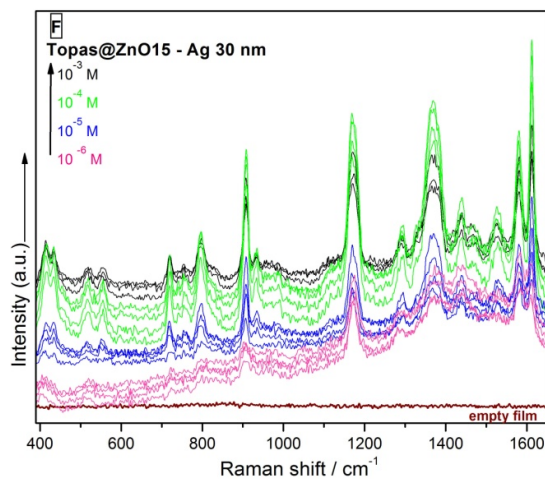



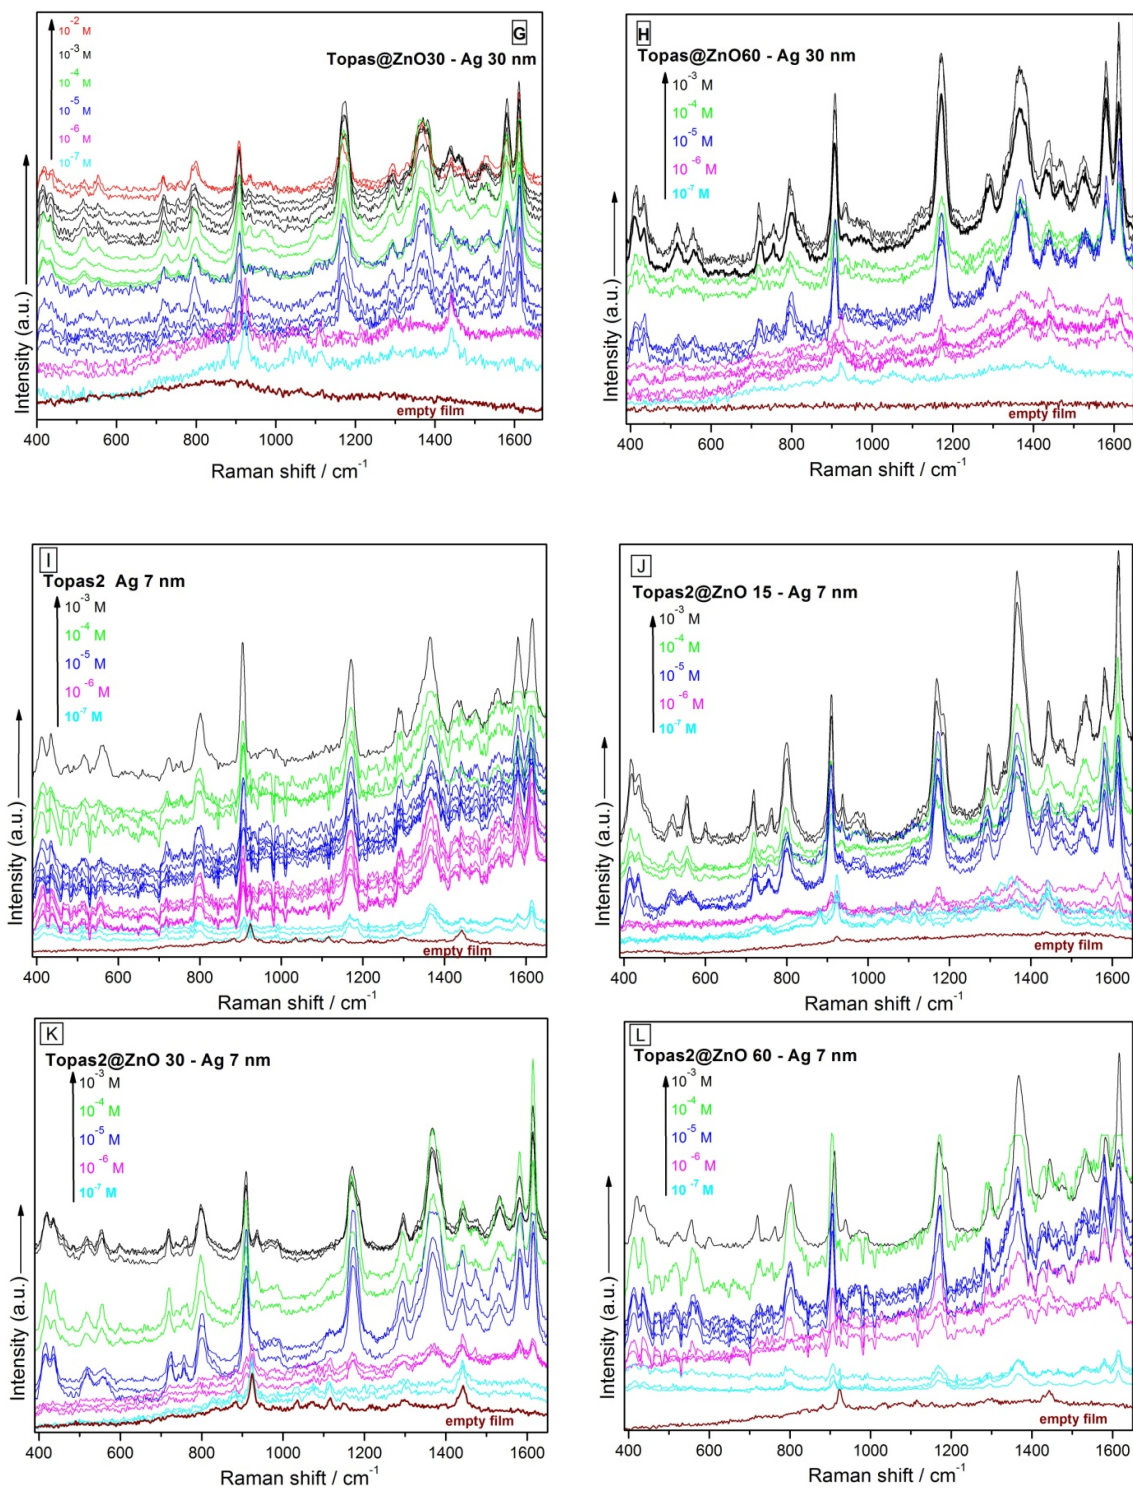

**Figure S4.** Comparative SERS spectra showing the reproducibility of the fingerprint of CV aqueous solutions on Zeonor® (A-D), Topas® (E-H) and Topas type 2 (I-L). All SERS spectra were measured using a laser power of 5 mW, 10 s/accumulation and 2 accumulations/spectrum.

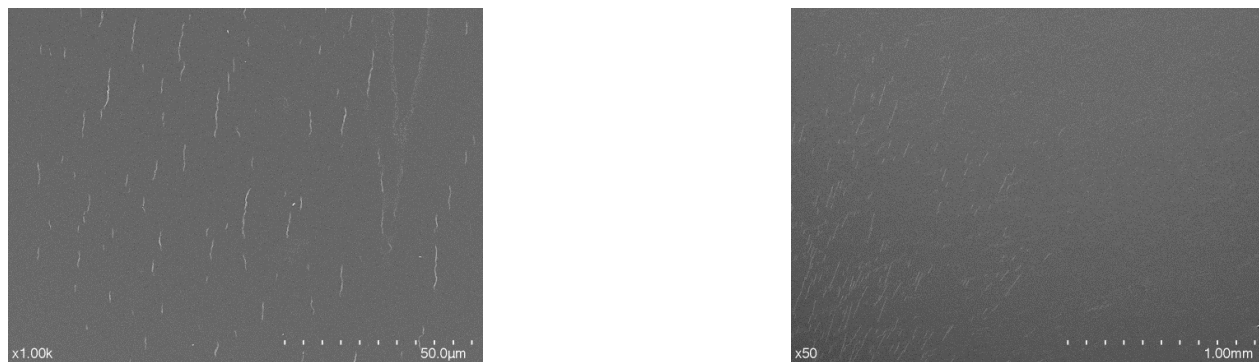

**Figure S5.** SEM micrographs showing defects in Topas@30 (left) and Topas@60 (right) samples.

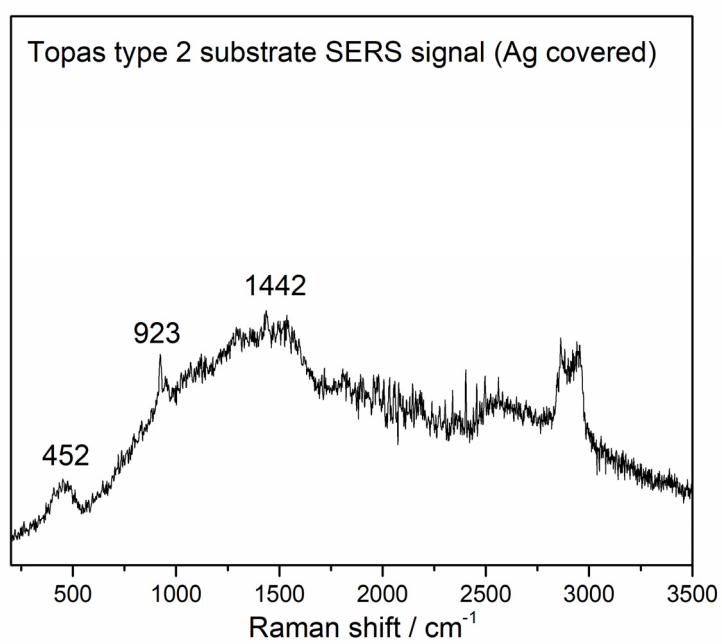

**Figure S6.** Representative SERS signal from the Topas type 2 substrate obtained after Ag thin film deposition.

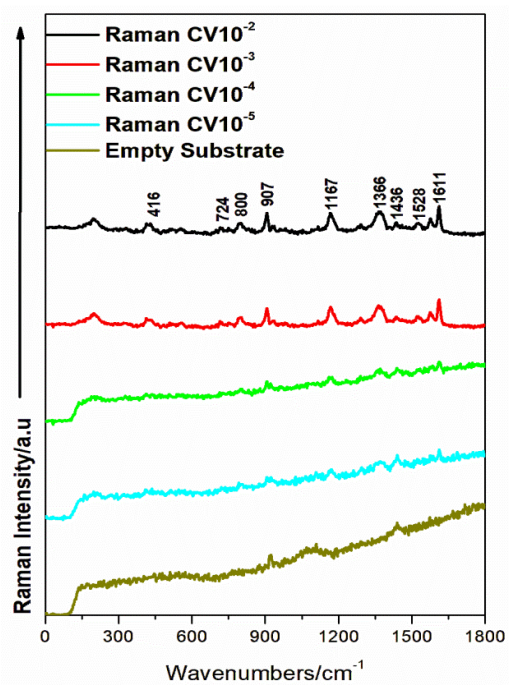

**Figure S7.** Representative Raman signal of CV aqueous solution of different concentrations on Zeonor® in comparison with the empty plastic substrate Raman signal.
